# Supplementary material for: Sociocultural–psychological predictors influencing parents' decision-making regarding HPV vaccination for their adolescent daughters in mainland China: An extended TPB model
Source: PubMed Central journal article supplement (PMC9853056; doi:10.3389/fpubh.2022.1035658), 2023-01-06
Supplement: Table_1.pdf [file Table_1.pdf]

## Appendix

Table 1. Seven-point Likert scales for 11 constructs were showed as below.

| Constructs                               | Measurement Items                                                                                                                                                                                                                                                                         | Literature                                                                     |
|------------------------------------------|-------------------------------------------------------------------------------------------------------------------------------------------------------------------------------------------------------------------------------------------------------------------------------------------|--------------------------------------------------------------------------------|
| Perceived Infection Risk<br>(PIR)        | PIR1: How worried are you about your daughter being exposed to HPV at present?<br>PIR2: How likely do you think your daughter is to be affected by HPV in the future?<br>PIR3: How seriously do you think that your daughter might become sick from HPV?                                  | van der Linden, S. (1,2);<br>Sarah Dryhurst, et al. (3);<br>Ran Wei et al. (4) |
| Perceived Vaccine Effectiveness<br>(PVE) | PVE1: I believe that the HPV vaccine is effective in preventing genital HPV infection.<br>PVE2: I believe that the HPV vaccine works to prevent genital HPV infection.<br>PVE3: I believe that if my daughter gets the HPV vaccine, she will be less likely to get genital HPV infection. | Loretta Brabin, et al. (5);<br>Xiaoli Nan and Kelly Madden (6)                 |
| Perceived Vaccine Side-Effects           | PVSE1: I worry about the short-term side-effects of the HPV                                                                                                                                                                                                                               |                                                                                |

|                                  |                                                                                                                                                                                                                                                                                                                                                                 |                                                                                            |
|----------------------------------|-----------------------------------------------------------------------------------------------------------------------------------------------------------------------------------------------------------------------------------------------------------------------------------------------------------------------------------------------------------------|--------------------------------------------------------------------------------------------|
| (PVSE)                           | <p>vaccine.</p> <p>PVSE2: I worry that the HPV vaccine might negatively affect my daughter's health.</p> <p>PVSE3: I worry that the HPV vaccine might have unknown long-term side-effects.</p>                                                                                                                                                                  |                                                                                            |
| Attitude toward Vaccination (AV) | <p>AV1: For my daughter, getting HPV vaccination at 13–15 years of age is beneficial.</p> <p>AV2: For my daughter, getting HPV vaccination at 13–15 years of age is necessary.</p> <p>AV3: For my daughter, getting HPV vaccination at 13–15 years of age is wise.</p> <p>AV4: For my daughter, getting HPV vaccination at 13–15 years of age is important.</p> | <p>Icek Ajzen (7);</p> <p>Abhyankar, Connor, and Lawton (8);</p> <p>Vinita Agarwal (9)</p> |
| Anticipated Regret (AR)          | <p>If I don't get my daughter vaccinated against HPV at 13–15 years of age,</p> <p>AR1: I will feel regret.</p> <p>AR2: I will be troubled.</p>                                                                                                                                                                                                                 | <p>Conner et al. (10)</p>                                                                  |

---

|                        |                                                                                                   |                                                     |
|------------------------|---------------------------------------------------------------------------------------------------|-----------------------------------------------------|
|                        | AR3: I will feel guilty.                                                                          |                                                     |
|                        | AR4: I will feel disappointed.                                                                    |                                                     |
| Anticipated Pride (AP) | If I get my daughter vaccinated against HPV at 13–15 years of age,                                |                                                     |
|                        | AP1: I will be proud.                                                                             |                                                     |
|                        | AP2: I will be happy.                                                                             |                                                     |
|                        | AP3: I will be satisfied.                                                                         |                                                     |
| Descriptive Norms (DN) | DN1: Most parents on the Internet have vaccinated their 13–15-year-old daughters against HPV.     |                                                     |
|                        | DN2: Most girls aged 13–15 years on the Internet are vaccinated against HPV.                      |                                                     |
|                        | DN3: Most of my friends have vaccinated their 13–15-year-old daughters against HPV.               | Icek Ajzen (7);<br>Mark Conner and Paul Norman (11) |
|                        | DN4: Most of my friends' daughters were vaccinated against HPV at 13–15 years of age.             |                                                     |
|                        | DN5: The parents of most of my daughter's classmates have vaccinated their daughters against HPV. |                                                     |

---

---

DN6: Most of my daughter's classmates are vaccinated against HPV.

---

Injunctive Norms on the Internet (INI) IN1: People online think that I should vaccinate my 13–15-year-old daughter.

IN2: People online approve of me vaccinating my 13–15-year-old daughter against HPV.

IN3: People online hope that I vaccinate my 13–15-year-old daughter against HPV.

---

Perceived Moral Obligation (PMO) PMO1: It is my responsibility to get my daughter vaccinated against HPV at 13–15 years of age.

PMO2: It is moral to have my daughter vaccinated against HPV at 13–15 years of age.

PMO3: It is in my values to have my daughter vaccinated against HPV at 13–15 years of age.

PMO4: I would feel incompetent if I didn't get my daughter vaccinated against HPV at 13–15 years of age.

---

E. Dubé et al. (12);  
Chu and Chiu (13)

---

|                                     |                                                                                |                                  |
|-------------------------------------|--------------------------------------------------------------------------------|----------------------------------|
| Self-Efficacy for Vaccination (SEV) | SEV1: I'm confident that I can take my daughter to get vaccinated against HPV. | Mark Conner and Paul Noman (11); |
|                                     | SEV2: It is very easy for my daughter to get the HPV vaccine.                  | Z. Janet Yang (14)               |
|                                     | SEV3: I can afford to get my daughter vaccinated against HPV.                  |                                  |

---

|                            |                                                                                                                                                               |                                                         |
|----------------------------|---------------------------------------------------------------------------------------------------------------------------------------------------------------|---------------------------------------------------------|
| Vaccination Intention (VI) | VI1: How likely would you be to accept vaccination of your daughter with the HPV vaccine sometime soon?                                                       |                                                         |
|                            | VI2: If you were faced with the decision of getting your daughter vaccinated against HPV today, how likely is it that you would choose to accept the vaccine? | Xiaoli Nan and Kelly Madden (6);<br>Rothman et al. (15) |
|                            | VI3: How likely would you be to accept your daughter's vaccination against HPV in the future?                                                                 |                                                         |

---

## References

1. van der Linden, S. The Social-Psychological Determinants of Climate Change Risk Perceptions: Towards a Comprehensive Model. *Journal of Environmental Psychology*. (2015)41: 112-24. doi: 10.1016/j.jenvp.2014.11.012.
2. van der Linden, S. Determinants and Measurement of Climate Change Risk Perception, Worry, and Concern. In: M. Nisbet, Editor. *Oxford Research Encyclopedia of Climate Science*. Oxford, UK: Oxford University Press (2017). p.1-49.
3. Sarah Dryhurst, Claudia R. Schneider, John Kerr, Alexandra L. J. Freeman, Gabriel Recchia, Anne Marthe van der Bles, David Spiegelhalter & Sander van der Linden. Risk perceptions of COVID-19 around the world. *Journal of Risk Research*. (2020) 23: 994-1006. doi: 10.1080/13669877.2020.1758193.
4. Wei, R., Lo, V.-H., & Lu, H.-Y. Reconsidering the Relationship Between the Third-Person Perception and Optimistic Bias. *Communication Research*. (2007) 34: 665–84. doi: <https://doi.org/10.1177/0093650207307903>.
5. Loretta Brabin, Stephen A. Roberts, Farah Farzaneh, Henry C. Kitchener. Future acceptance of adolescent human papillomavirus vaccination: A survey of parental attitudes. *Vaccine*. (2006)24: 3087-94. doi: <https://doi.org/10.1016/j.vaccine.2006.01.048>.
6. Xiaoli Nan & Kelly Madden. HPV Vaccine Information in the Blogosphere: How Positive and Negative Blogs Influence Vaccine-Related Risk Perceptions, Attitudes, and Behavioral Intentions. *Health Communication*. (2012) 27:829-36. doi: 10.1080/10410236.2012.661348.
7. Icek Ajzen. Constructing a TPB Questionnaire: Conceptual and Methodological Considerations. 2006. Available online at: <https://citeseerx.ist.psu.edu/viewdoc/download?doi=10.1.1.601.956&rep=rep1&type=pdf>

(accessed Aug 10, 2022).

8. Purva Abhyankar, Daryl B. O'connor & Rebecca Lawton. The role of message framing in promoting MMR vaccination: Evidence of a loss-frame advantage. *Psychology, Health & Medicine*. (2008) 13:1-16. doi: 10.1080/13548500701235732.
9. Vinita Agarwal. A/H1N1 Vaccine Intentions in College Students: An Application of the Theory of Planned Behavior. *Journal of American College Health*. (2014) 62:416-24.  
doi: 10.1080/07448481.2014.917650.
10. Conner, M., Godin, G., Sheeran, P., & Germain, M. Some feelings are more important: Cognitive attitudes, affective attitudes, anticipated affect, and blood donation. *Health Psychology*. (2013) 32: 264-72. doi: <https://doi.org/10.1037/a0028500>.
11. Mark Conner and Paul Norman. *Predicting Health Behaviour: Research and Practice with Social Cognition Models*. Buckingham: Open University Press (1996).
12. PIN-YU CHU & JA-FUN CHIU. Factors Influencing Household Waste Recycling Behavior: Test of an Integrated Model. *Journal of Applied Social Psychology*. (2003)33: 604-26. doi: <https://doi.org/10.1111/j.1559-1816.2003.tb01915.x>.
13. Z. Janet Yang. Predicting Young Adults' Intentions to Get the H1N1 Vaccine: An Integrated Model. *Journal of Health Communication*. (2015)20: 69-79.  
doi: 10.1080/10810730.2014.904023.
14. Dubé E, Gagnon D, MacDonald N, Bocquier A, Peretti-Watel P, Verger P. Underlying factors impacting vaccine hesitancy in high income countries: a review of qualitative studies. *Expert Rev Vacc*. (2018) 17:989-1004. doi: <https://doi.org/10.1080/14760584.2018.1541406>.
15. Rothman AJ, Martino SC, Bedell BT, Detweiler JB, Salovey P. The Systematic Influence

of Gain-and Loss-Framed Messages on Interest in and Use of Different Types of Health Behavior. *Personality and Social Psychology Bulletin*. (1999) 25:1355-69. doi:10.1177/0146167299259003.
